# Supplementary material for: Changes Observed in Potential Key Candidate Genes of Peripheral Immunity Induced by Tai Chi among Patients with Parkinson’s Disease
Source: MDPI journal article supplement (doi:10.3390/genes13101863), 2022-10-15
Supplement: s1 [file s1]

# **Changes observed in potential key candidate genes of peripheral immunity induced by Tai Chi among patients with Parkinson's disease**

Guang Yang<sup>1\*</sup>, Qun Dong<sup>2\*</sup>, Huixin Yang<sup>3</sup>, Fan Wang<sup>3</sup>, Linwei Chen<sup>3</sup>, Junze Tang<sup>3</sup>, Guoyuan Huang<sup>4#</sup> and Ying Zhao<sup>1#</sup>

<sup>1</sup> Department of Physical Education, Shanghai Jiao Tong University, Shanghai 200240, China

<sup>2</sup> Department of Bioinformatics and Biostatistics, School of Life Sciences and Biotechnology, Shanghai Jiao Tong University, Shanghai, 200240, China.

<sup>3</sup> Institute of National Traditional Sports, Harbin Sport University, Harbin, 150006, China

<sup>4</sup> Pott College of Science, Engineering and Education, University of Southern Indiana, Indiana 47712, USA

\* Co-first-authors contributed equally to this work.

# Correspondence: ghuang@usi.edu; zhaoying514@163.com

# Sample clustering to detect outliers

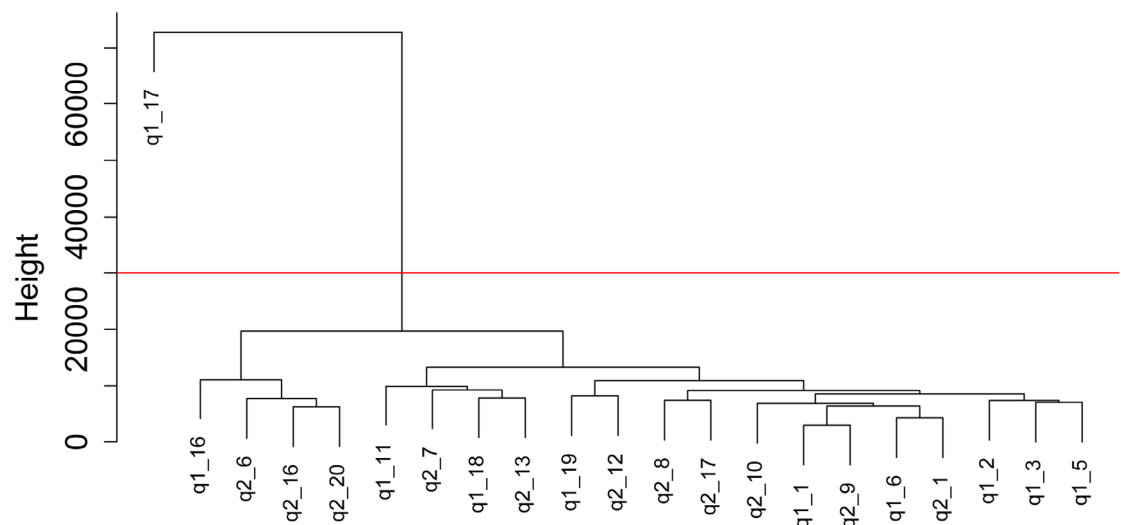

Figure S1. Sample clustering.

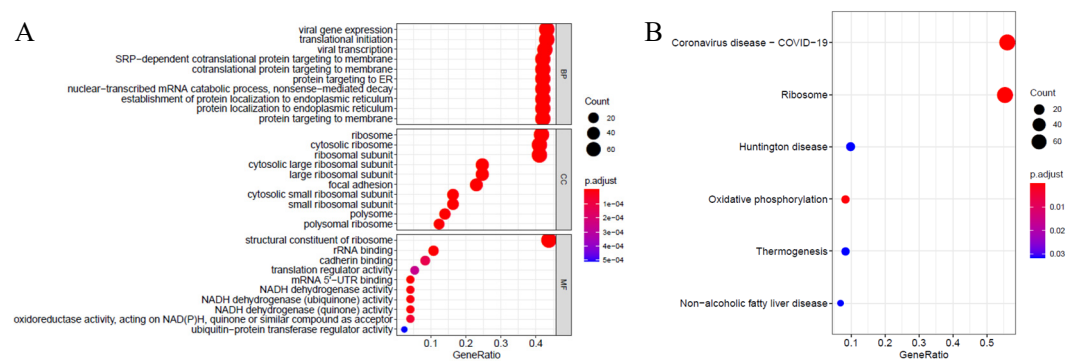

Figure S2. Go and KEGG enrichment analysis of brown modules. A: GO pathway analysis of brown modules. B: KEGG function enrichment analysis of brown module.

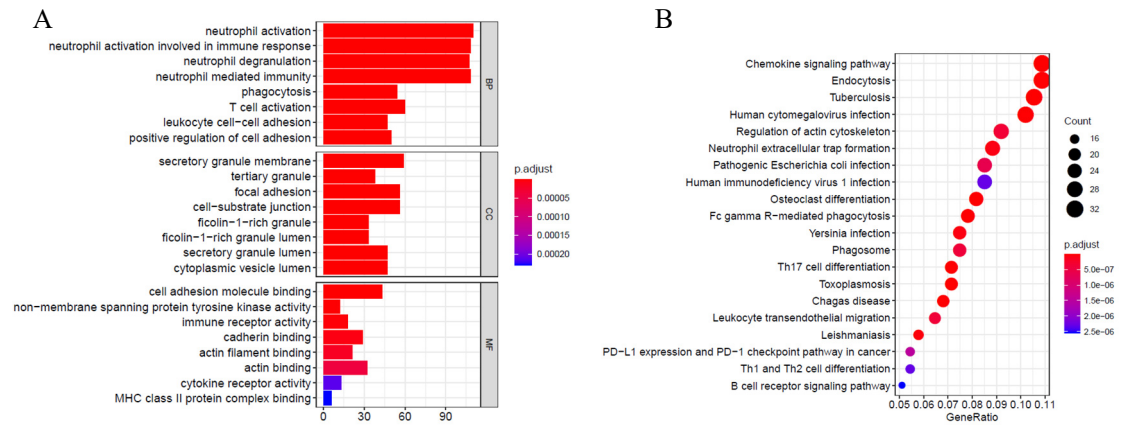

Figure S3. Go and KEGG enrichment analysis of turquoise modules. A: GO pathway analysis of turquoise modules. B: KEGG function enrichment analysis of turquoise module.
